# Supplementary material for: Dietary Patterns Associated with Abnormal Glucose Tolerance following Gestational Diabetes Mellitus: The MyNutritype Study
Source: MDPI journal article supplement (doi:10.3390/nu15122819), 2023-06-20
Supplement: s1 [file s1]

**Table S1.** Factor loading scores for dietary patterns identified by principal component analysis

| Food Groups                                    | Dietary Patterns and Factor Loading Scores |                                               |                                           |                             |                                                 |
|------------------------------------------------|--------------------------------------------|-----------------------------------------------|-------------------------------------------|-----------------------------|-------------------------------------------------|
|                                                | DP 1<br>(Unhealthy)                        | DP 2<br>(Fish-Eggs-<br>Fruits-<br>Vegetables) | DP 3<br>(Cereals-<br>Confectionar<br>ies) | DP 4<br>(Legumes-<br>dairy) | DP 5<br>(Meat-Sugar-<br>Sweetened<br>Beverages) |
| Cereals and grains                             | 0.192                                      | 0.049                                         | <b>0.705</b>                              | 0.088                       | 0.293                                           |
| Fast food                                      | <b>0.628</b>                               | 0.017                                         | 0.243                                     | 0.176                       | 0.158                                           |
| Meat and poultry                               | -0.104                                     | 0.201                                         | -0.089                                    | -0.176                      | <b>0.774</b>                                    |
| Fish and seafood                               | 0.006                                      | <b>0.687</b>                                  | -0.004                                    | -0.025                      | -0.111                                          |
| Eggs                                           | 0.096                                      | <b>0.643</b>                                  | -0.026                                    | -0.047                      | 0.244                                           |
| Legumes                                        | -0.050                                     | 0.019                                         | 0.072                                     | <b>0.872</b>                | -0.081                                          |
| Milk and dairy products                        | <b>0.325</b>                               | 0.293                                         | <b>-0.474</b>                             | <b>0.463</b>                | 0.122                                           |
| Fruits and vegetables                          | -0.012                                     | <b>0.648</b>                                  | 0.283                                     | 0.230                       | 0.040                                           |
| Coffee, tea, and sugar-<br>sweetened beverages | <b>0.313</b>                               | -0.174                                        | 0.236                                     | 0.265                       | <b>0.535</b>                                    |
| Confectionaries                                | 0.209                                      | 0.207                                         | <b>0.627</b>                              | 0.012                       | -0.246                                          |
| Sugar, honey, bread<br>spreads, and creamer    | <b>0.819</b>                               | -0.133                                        | 0.020                                     | -0.051                      | -0.011                                          |
| Condiments                                     | <b>0.720</b>                               | 0.285                                         | 0.097                                     | -0.072                      | 0.029                                           |

DP: dietary pattern. Bold indicates factor loading score  $\geq 0.3$  (high intake of dietary pattern) or  $\leq -0.3$  (low intake of dietary pattern).
